# Supplementary material
Source: publisher figshare collection journal article supplement (https://springernature.figshare.com/ndownloader/files/37663558)
Supplement: Supplementary file [file 37663558]

Additional Figure 1. Model prediction *versus* observed cefoxitin concentrations

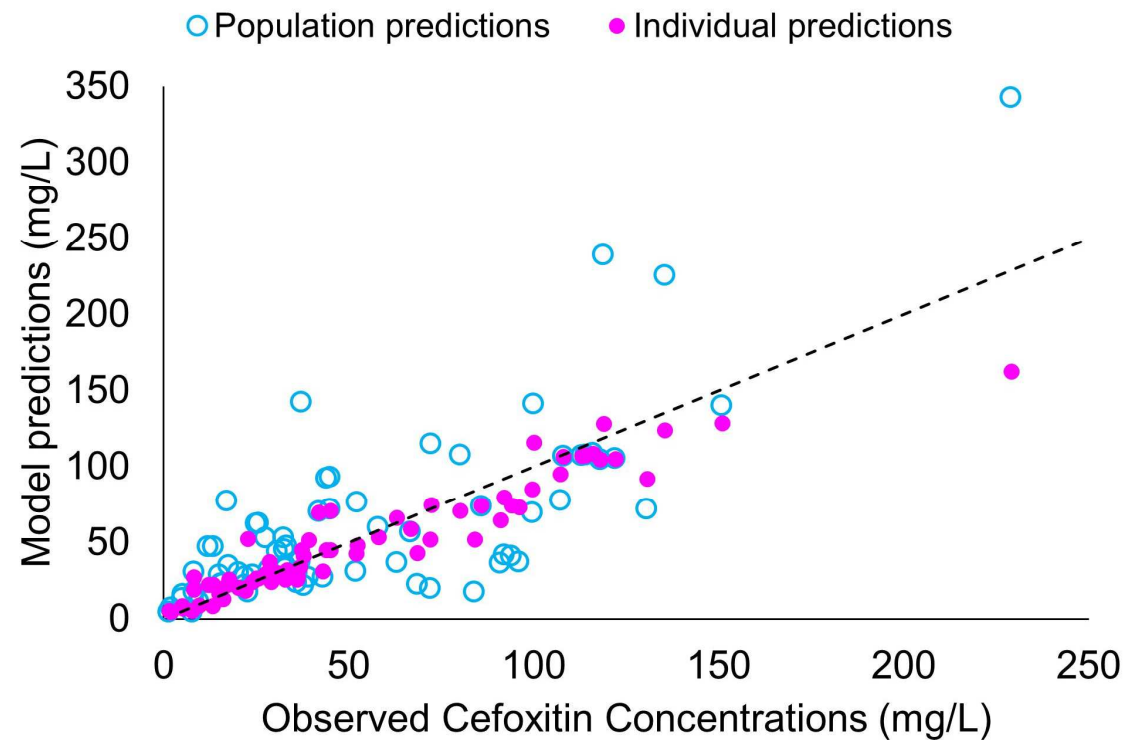

$R^2 = 0.91$ ; Mean prediction error (bias): -3.5 mg/l; Median absolute error (imprecision): 14.5 %

The dashed line is the line of identity ( $y = x$ )
